# Supplementary material for: Human breast tumor-infiltrating CD8+ T cells retain polyfunctionality despite PD-1 expression
Source: PubMed Central journal article supplement (PMC6191461; doi:10.1038/s41467-018-06653-9), 2018-10-16
Supplement: 41467_2018_6653_MOESM1_ESM.pdf [file 41467_2018_6653_MOESM1_ESM.pdf]

## **Supplementary Information**

“Human breast tumor-infiltrating CD8<sup>+</sup> T cells retain polyfunctionality despite PD-1 expression”

Egelston, et al

| <b>Breast Cancer Patient Characteristics<br/>n=61</b> |        |
|-------------------------------------------------------|--------|
| <b>Age (years)</b>                                    |        |
| Mean, Median                                          | 55, 55 |
| Range                                                 | 31-93  |
| Previously Treated                                    | n=9    |
| <b>Molecular Subtype</b>                              |        |
| ER+                                                   | n=52   |
| ER- HER2+                                             | n=1    |
| ER- PR- HER2-                                         | n=8    |
| <b>Overall Stage</b>                                  |        |
| I                                                     | n=16   |
| II                                                    | n=27   |
| III                                                   | n=13   |
| IV                                                    | n=3    |
| Recurrent                                             | n=2    |

Supplementary Table 1. Breast Cancer Patient Clinical Characteristics.

| <b>Melanoma Patient Characteristics<br/>n=10</b> |        |
|--------------------------------------------------|--------|
| <b>Age (years)</b>                               |        |
| Average, Median                                  | 67, 71 |
| Range                                            | 33-92  |
| <b>Overall Stage</b>                             |        |
| I                                                | n=0    |
| II                                               | n=2    |
| III                                              | n=7    |
| IV                                               | n=1    |
| <b>Anatomical Location</b>                       |        |
| Cutaneous                                        | n=6    |
| Lymph Node                                       | n=3    |
| Lung                                             | n=1    |

Supplementary Table 2. Melanoma Patient Clinical Characteristics.

| <b>Antibody</b>                      | <b>Clone</b> | <b>Fluorophore</b> | <b>Dilution</b> | <b>Company</b>                         |
|--------------------------------------|--------------|--------------------|-----------------|----------------------------------------|
| <b><i>Surface Antigens</i></b>       |              |                    |                 |                                        |
| CCR7                                 | G043H7       | BV421              | 1:100           | Biolegend                              |
| CD45RA                               | HI100        | APC-Cy7            | 1:200           | Biolegend                              |
| PD-1                                 | EH12.1       | BV605              | 1:50            | BD Biosciences                         |
| PD-1                                 | EH12.1       | PE                 | 1:50            | BD Biosciences                         |
| TIGIT                                | MBSA43       | PercpEF710         | 1:100           | eBioscience (Thermo Fisher Scientific) |
| 2B4                                  | C1.7         | PercpEF710         | 1:100           | Biolegend                              |
| BTLA                                 | J168-540     | BV421              | 1:100           | BD Biosciences                         |
| TIM-3                                | F38-2E2      | BV605              | 1:100           | Biolegend                              |
| LAG-3                                | 3DS223H      | FITC               | 1:100           | eBioscience (Thermo Fisher Scientific) |
| CD160                                | BY55         | AF488              | 1:100           | BD Biosciences                         |
| CD127                                | A019D5       | AF647              | 1:100           | Biolegend                              |
| KLRG1                                | SA231A2      | FITC               | 1:100           | Biolegend                              |
| CD8                                  | BUV805       | SK1                | 1:200           | BD Biosciences                         |
| CD3                                  | BUV496       | UCHT1              | 1:200           | BD Biosciences                         |
| CD19                                 | APC/Cy7      | H1B19              | 1:200           | Biolegend                              |
| CD4                                  | OKT4         | PerCp-Cy5.5        | 1:200           | Biolegend                              |
| CD33                                 | P67.6        | PE-Cy7             | 1:200           | BD Biosciences                         |
| <b><i>Intracellular Antigens</i></b> |              |                    |                 |                                        |
| T-bet                                | 4B10         | PE-Cy7             | 1:100           | Biolegend                              |
| Eomes                                | WD1928       | PE                 | 1:100           | eBioscience (Thermo Fisher Scientific) |
| IFN $\gamma$                         | B27          | AF700              | 1:100           | BD Biosciences                         |
| IL-2                                 | MQ1-17H12    | FITC               | 1:100           | BD Biosciences                         |
| TNF $\alpha$                         | MAb11        | BV421              | 1:100           | Biolegend                              |
| CD107a                               | eBioH4A3     | APC                | 1:100           | eBioscience (Thermo Fisher Scientific) |
| CD107b                               | eBioH4B4     | APC                | 1:100           | eBioscience (Thermo Fisher Scientific) |
| FOXP3                                | 259D         | PE                 | 1:50            | Biolegend                              |

Supplementary Table 3. Fluorescent antibody conjugates used in this study.

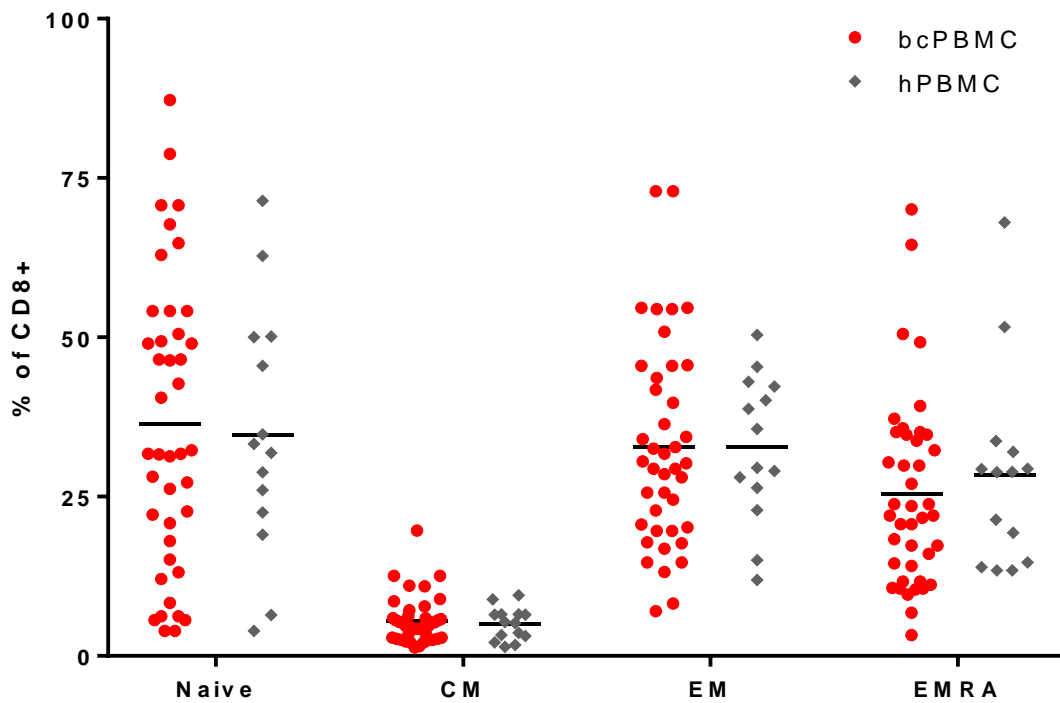

Supplementary Figure 1. Circulating CD8<sup>+</sup> T cells in breast cancer patients have a similar memory phenotype as in healthy donors. Memory phenotypes of CD8<sup>+</sup> T cells in patient peripheral blood mononuclear cells (bcPBM) and age-matched healthy donors (hPBM) were phenotypically characterized by flow cytometry. Graph depicts percentage of naïve (CCR7<sup>+</sup> CD45RA<sup>+</sup>), central memory (CM, CCR7<sup>+</sup> CD45RA<sup>-</sup>), effector memory (EM, CCR7<sup>-</sup> CD45RA<sup>-</sup>), or effector memory RA<sup>+</sup> (EMRA, CCR7<sup>-</sup> CD45RA<sup>+</sup>). Each symbol represents data from a unique patient sample.

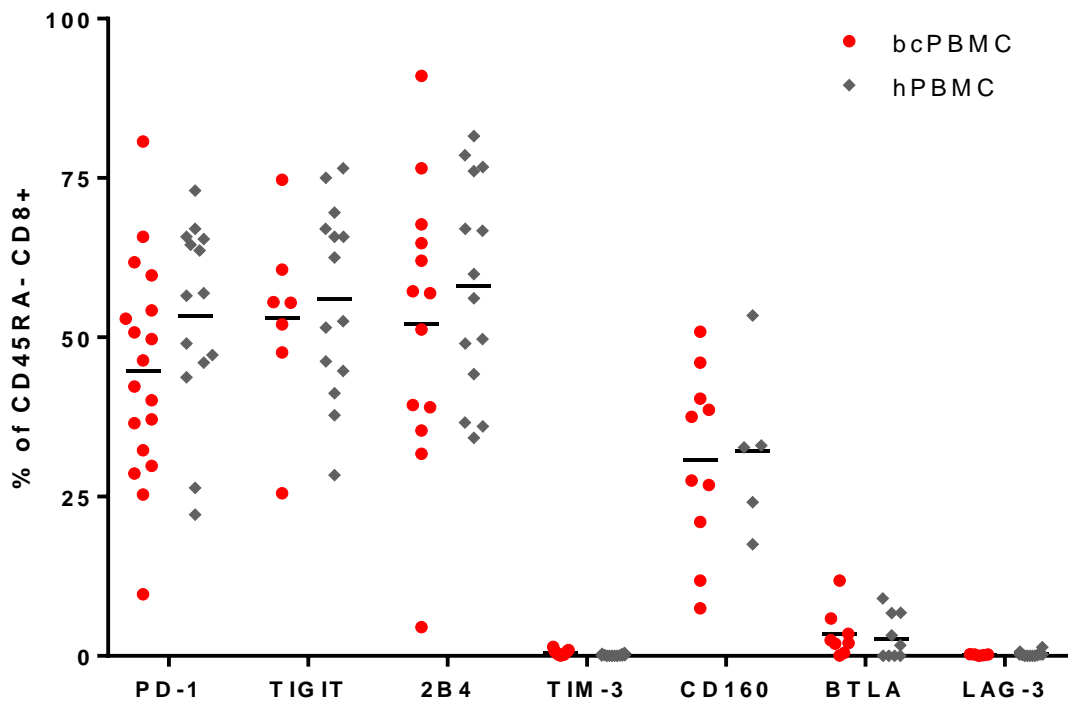

Supplementary Figure 2. Circulating CD8<sup>+</sup> T cells of breast cancer patients express similar frequencies of checkpoint molecules as in healthy donors. CD8<sup>+</sup> T cells from bcPBMC, and hPBMC were assessed for expression of various checkpoint molecules by flow cytometry. Graph depicts percentage of non-naïve CD45RA<sup>-</sup> CD8<sup>+</sup> T cells that express a given checkpoint molecule. Each symbol represents data from a unique patient sample.

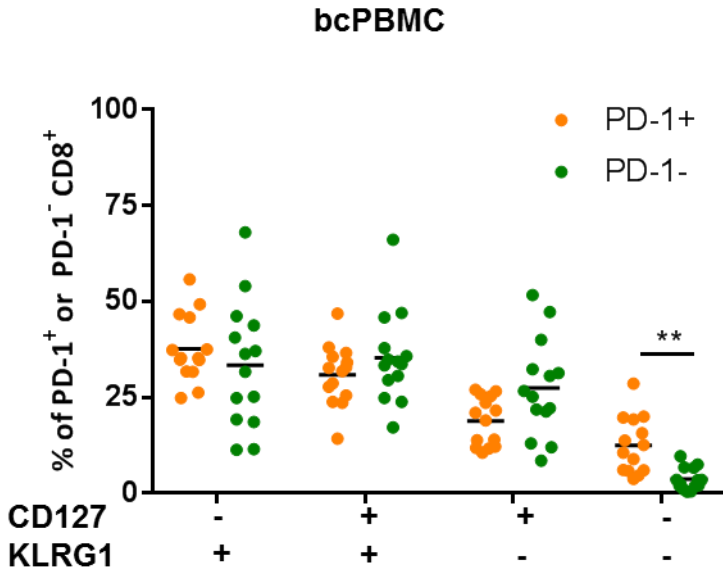

Supplementary Figure 3. Circulating PD-1<sup>+</sup> CD8<sup>+</sup> T cells and PD-1<sup>-</sup> CD8<sup>+</sup> T cells have similar CD127 and KLRG1 expression patterns. Circulating CD8<sup>+</sup> T cells from breast cancer patient PBMCs were assessed for expression of CD127 and KLRG1. Graphs depict frequencies of CD8<sup>+</sup> T cells from bcPBMC with a given expression of CD127 and KLRG1 within PD-1<sup>+</sup> and PD-1<sup>-</sup> populations. Each symbol represents data from a unique patient sample. Significance was calculated using one-way ANOVA and Holm-Sidak multiple comparison tests. \*\*,  $p < 0.01$

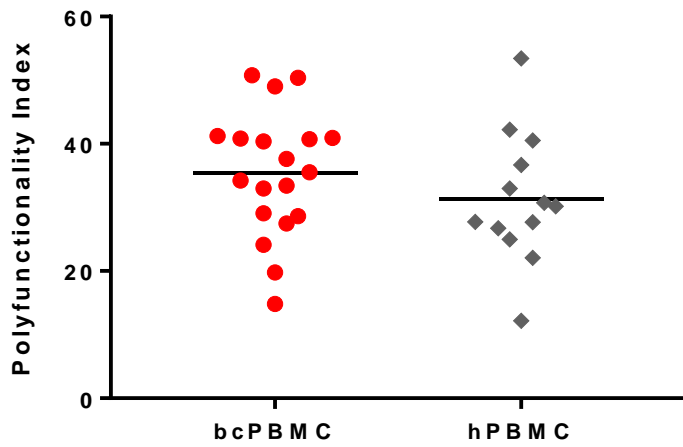

Supplementary Figure 4. Circulating CD8<sup>+</sup> T cells from breast cancer patients and healthy donors exhibit similar functional capacity. CD8<sup>+</sup> T cells from bcPBM C and hPBM C tissues were stimulated with PMA and ionomycin for 4 hours followed by intracellular staining for production of IFN $\gamma$ , TNF $\alpha$ , and IL-2. Graph depicts calculated polyfunctionality indices for non-naïve CD8<sup>+</sup> T cells. Each symbol represents a single patient tissue sample.



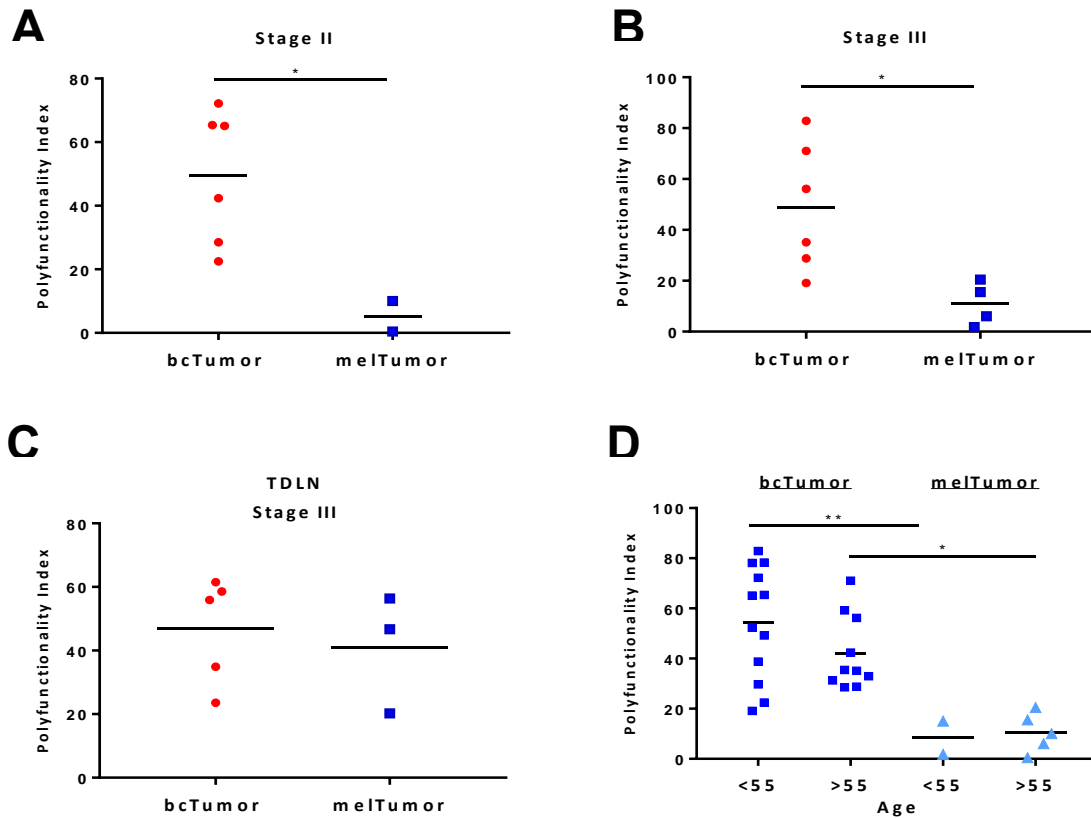

Supplementary Figure 5. Greater polyfunctional capacity of CD8+ TILs in breast tumors compared to melanoma tumors is not due to age or stage differences. CD8+ T cells from bcTumor and melTumor tissues were assessed for intracellular staining for production of IFN $\gamma$ , TNF $\alpha$ , and IL-2 as calculated by a polyfunctionality indices. Each symbol represents a single patient tissue sample. Results between bcTumors and melTumors were compared statistically by segregation into Stage II bcTumor (n=6) and melTumor (n=2) samples (A), Stage III bcTumor (n=6) and melTumor (n=4) samples (B), Stage III tumor positive tumor draining lymph nodes (TDLN) from bcTumor (n=5) and melTumor (n=3) (C).

Polyfunctionality results were also segregated according to age as bcTumors samples from patients less than 55 years old (n=12) or older than 55 years old (n=10) and to melTumor samples from patients less than 55 years old (n=2) and older than 55 years old (n=5) (D). Significance was calculated using an unpaired student t test (A,B,C) or one-way ANOVA and Holm-Sidak multiple comparison tests (D). \*, p<0.05, \*\*, p<0.01

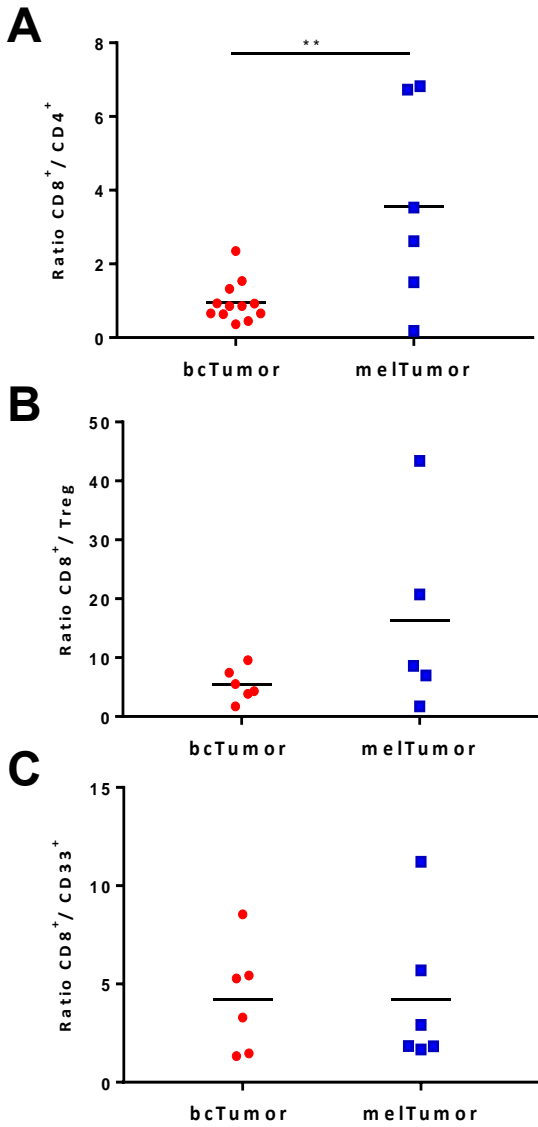

Supplementary Figure 6. Melanoma tumors do not contain higher ratios of suppressive cells to CD8+ T cells. Single cell suspensions from bcTumors and melTumors were assessed for the presence of CD4+ T cells, CD4+ Foxp3+ T cells (Treg), and CD33+ myeloid cells by flow cytometry. A) Graphs depicts the ratios of CD8+ T cells to CD4+ T cells in bcTumors (n=12) and melTumors (n=6). B) Graph depicts the ratios of CD8+ T cells to CD4+ FOXP3+ T cells in bcTumors (n=6) and melTumors (n=5). C) Graph depicts the ratios of CD8+ T cells to CD33+ myeloid cells in bcTumors (n=6) and melTumors (n=6) (C). Each symbol represents data from a unique patient sample. Significance was calculated using an unpaired student t test; \*\*, p<0.01

**A**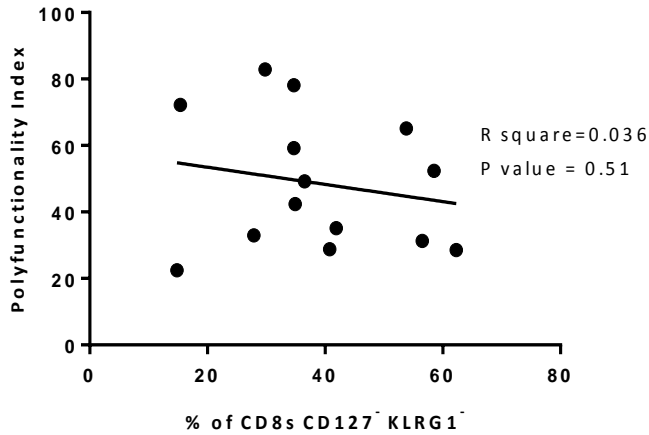**B**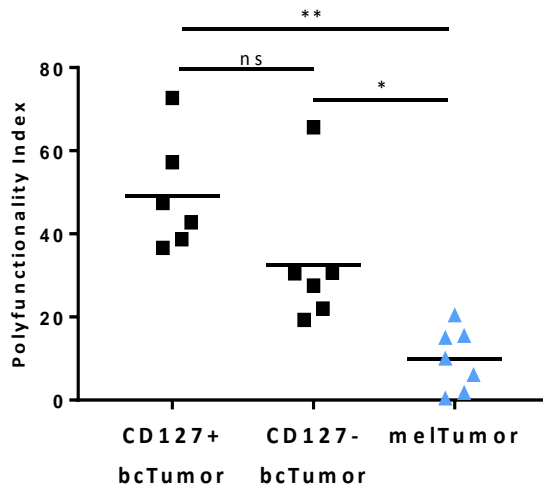

Supplementary Figure 7. Loss of CD127 does not necessarily implicate CD8<sup>+</sup> T cell exhaustion in human breast tumors. A) Polyfunctionality of CD8<sup>+</sup> TILs from bcTumor (n=14) was examined for correlation to the frequency of CD8<sup>+</sup> TILs that have a CD127<sup>-</sup> KLRG1<sup>-</sup> phenotype. A linear regression line with r squared value and p value is shown. B) Polyfunctionality of CD127<sup>+</sup> or CD127<sup>-</sup> CD8<sup>+</sup> TILs from bcTumor (n=6) was assessed and compared to CD8<sup>+</sup> TILs from melTumor (n=7). Each symbol represents data from a unique patient sample. Significance was calculated using one-way ANOVA and Holm-Sidak multiple comparison tests. \*, p<0.05; \*\*\*, p<0.001.

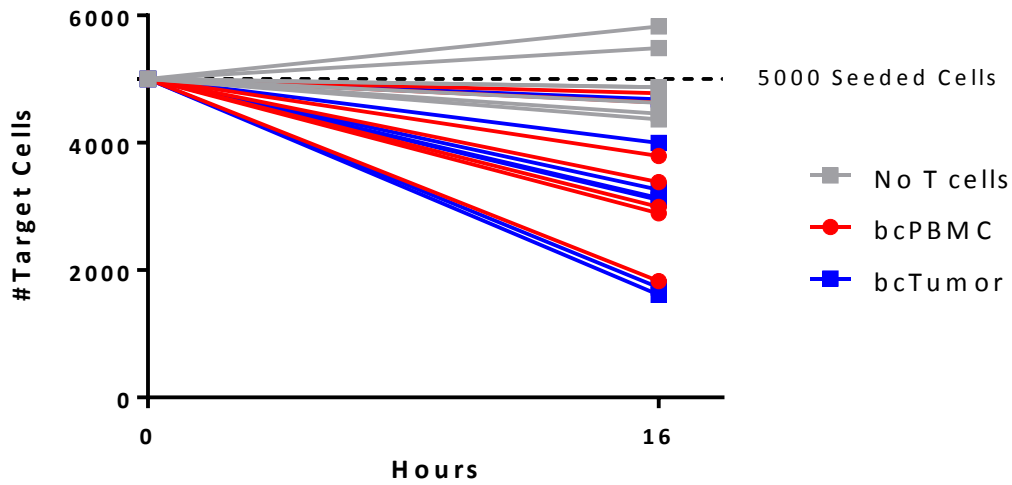

Supplementary Figure 8. CD8+ TILs from breast tumors have cytotoxic capacity. Graph depicts absolute counts of CD19 expressing target cells after overnight culture or overnight co-culture with CD8+ T cells from either bcPBMC (n=7) or bcTumor (n=7) of breast cancer patients and CD19:CD3 bispecific antibodies. Effector: Target ratios were 1:1. The dashed line denotes the number of target cells seeded at the beginning of the co-culture experiment.
